# Supplementary material for: Controlling the distance between hydrogen-bonded chloro-s-triazine tapes: crystal engineering using N-alkyl chains and the influence of temperature
Source: Royal Society of Chemistry journal article supplement (doi:10.1039/c7ce01049d), 2017-01-01
Supplement: c7ce01049d1.pdf [file c7ce01049d1.pdf]

## Supplementary Information:

### Controlling the distance between hydrogen-bonded chloro-*s*-triazine tapes: crystal engineering using *N*-alkyl chains and the influence of temperature

Vina R. Aldilla,<sup>a</sup> Mohan Bhadbhade,<sup>b</sup> Saroj Bhattacharyya,<sup>b</sup> Naresh Kumar,<sup>a</sup> Anne M. Rich,<sup>b</sup> Christopher E. Marjo.\*<sup>b</sup>

<sup>a</sup> School of Chemistry, Chemical Sciences Building (F10), University of New South Wales, Kensington, NSW, Australia 2052

<sup>b</sup> Mark Wainwright Analytical Centre, Room G61, Chemical Sciences Building (F10), University of New South Wales, Kensington, NSW, Australia 2052

\*Corresponding author. Tel.: +612 9385 4693; fax: +612 9385 4663.

E-mail address: [c.marjo@unsw.edu.au](mailto:c.marjo@unsw.edu.au)

Table S1: Details of single-crystal analysis of mono-*N*-butyl **3a** and mono-*N*-pentyl **3b**.

|                                | <b>3a</b> (100 K)                                             | <b>3b</b> (100 K)                                             |
|--------------------------------|---------------------------------------------------------------|---------------------------------------------------------------|
| Chemical formula               | C <sub>7</sub> H <sub>10</sub> Cl <sub>2</sub> N <sub>4</sub> | C <sub>8</sub> H <sub>12</sub> Cl <sub>2</sub> N <sub>4</sub> |
| <i>M<sub>r</sub></i>           | 221.09                                                        | 235.12                                                        |
| Crystal system,<br>space group | Triclinic, <i>P</i> <sup>−</sup> 1                            | Monoclinic,<br><i>C</i> 2/ <i>c</i>                           |
| CCDC deposition<br>number      | 1552799                                                       | 1552800                                                       |
| Temperature (K)                | 100                                                           | 100                                                           |
| <i>a</i>                       | 5.012(1)                                                      | 25.548(5)                                                     |
| <i>b</i>                       | 11.794(2)                                                     | 5.000(1)                                                      |
| <i>c</i> (Å)                   | 17.086(3)                                                     | 9.343(4)                                                      |
| <i>α</i>                       | 86.52(3)                                                      |                                                               |
| <i>β</i>                       | 84.11(3)                                                      | 115.30(3)                                                     |
| <i>γ</i> (°)                   | 82.67(3)                                                      |                                                               |
| <i>V</i> (Å <sup>3</sup> )     | 995.3(4)                                                      | 2233.8(9)                                                     |

|                                                                       |                        |                        |
|-----------------------------------------------------------------------|------------------------|------------------------|
| <i>Z</i>                                                              | 4                      | 8                      |
| Radiation type                                                        | 0.71073 Å              | 0.71073 Å              |
| $\mu$ (mm <sup>-1</sup> )                                             | 0.61                   | 0.55                   |
| Crystal size (mm)                                                     | 0.02 × 0.02 × 0.01     | 0.02 × 0.02 × 0.01     |
| Data collection                                                       |                        |                        |
| Diffractometer                                                        | Australian Synchrotron | Australian Synchrotron |
| Absorption correction                                                 | -                      | -                      |
| $T_{\min}, T_{\max}$                                                  | -                      | -                      |
| No. of measured, independent and observed [ $I > 2s(I)$ ] reflections | 12269, 3181, 2979      | 12722, 1841, 1673      |
| $R_{\text{int}}$                                                      | 0.018                  | 0.022                  |
| $(\sin \theta/\lambda)_{\max}$ (Å <sup>-1</sup> )                     | 0.595                  | 0.594                  |
| Refinement                                                            |                        |                        |
| $R[F^2 > 2s(F^2)]$                                                    | 0.030                  | 0.038,                 |
| $wR(F^2)$                                                             | 0.077                  | 0.096                  |
| $S$                                                                   | 1.08                   | 1.12                   |
| No. of reflections                                                    | 3181                   | 1841                   |
| No. of parameters                                                     | 237                    | 128                    |
| No. of restraints                                                     | 0                      | 0                      |
| H-atom treatment                                                      | Constrained            | Constrained            |
| $D\bar{\rho}_{\max}, D\bar{\rho}_{\min}$ (e Å <sup>-3</sup> )         | 0.24, -0.27            | 0.25, -0.40            |

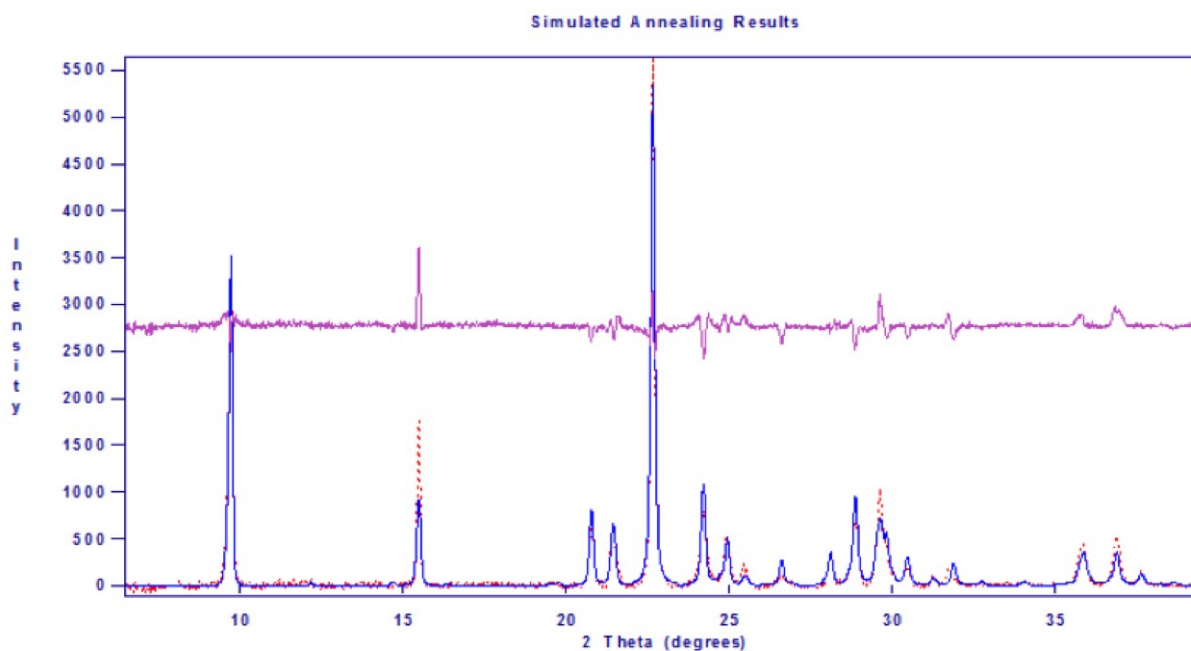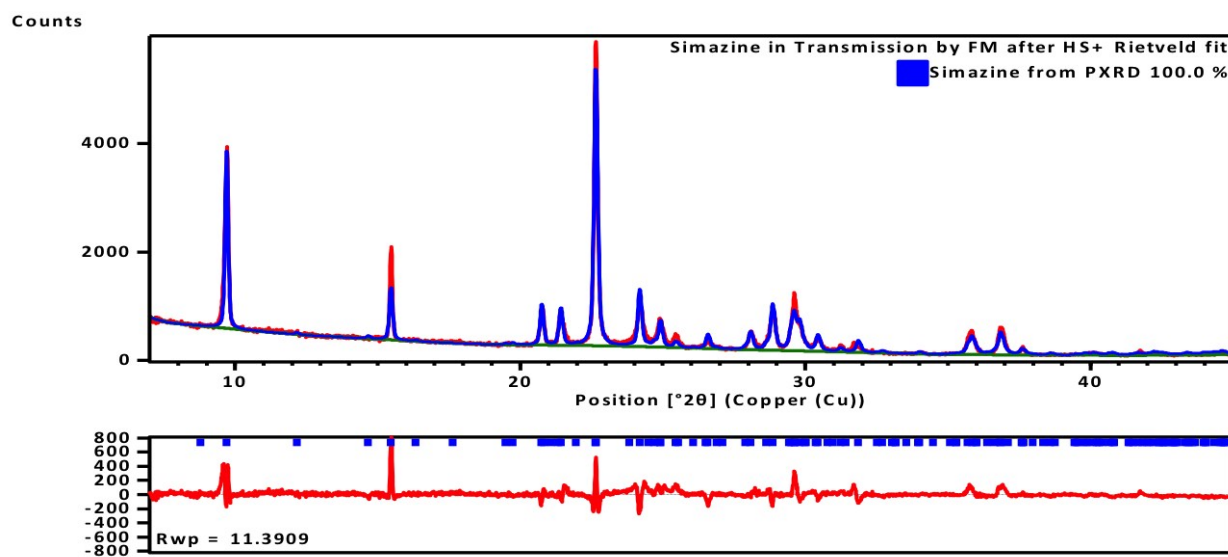

Figure S1: Experimental and calculated powder diffraction patterns for **1a** (298 K) obtained from (a) structure solution using simulated annealing in DASH and (b) Rietveld refinement of peak profiles using HighScore plus.

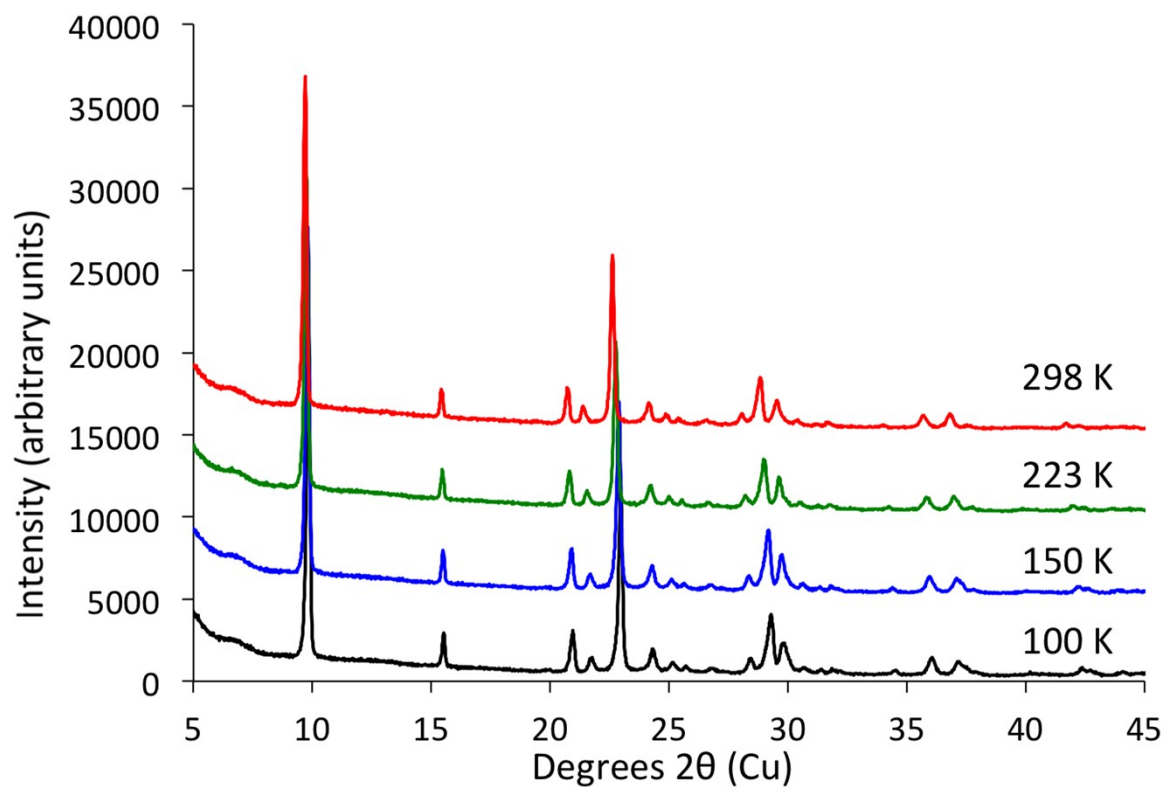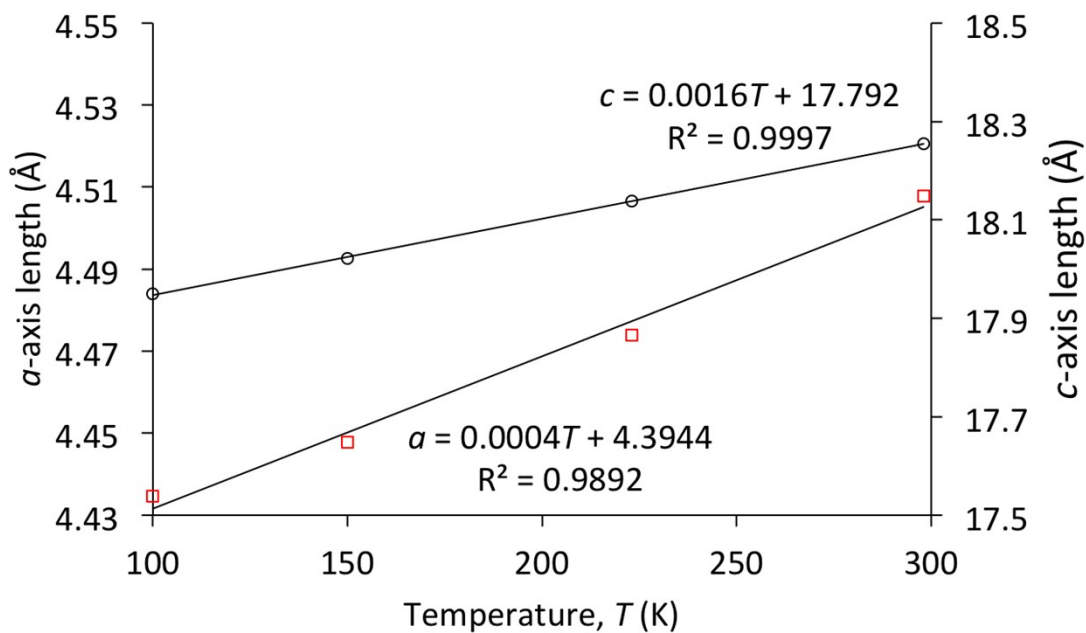

Figure S2: Variation of powder diffraction pattern of **1a** showing decrease in peak position with increasing temperature from 100 K to 298 K (top). The cell axes show small, linear changes with temperature, with the  $a$ -axis and  $c$ -axis increasing by 1.7% while the  $b$ -axis (not shown) increases by 0.6%.

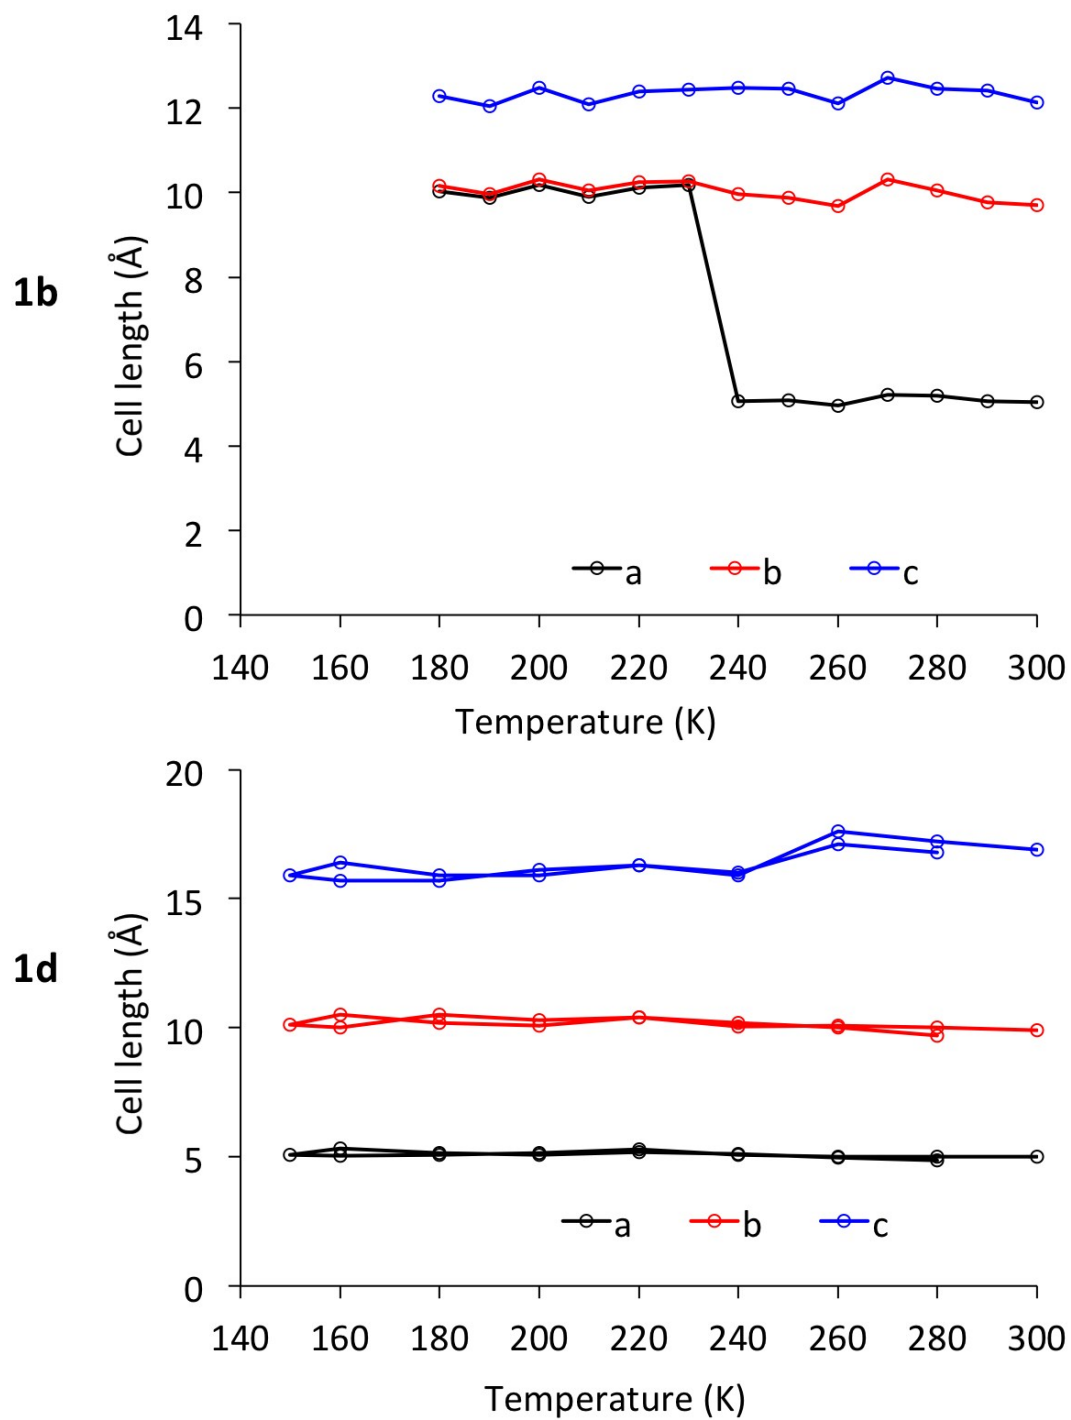

Figure S3: Structural transitions occurring with increasing temperature in the odd-carbon number derivatives, bis-*N*-propyl **1b** and bis-*N*-pentyl **1d**. Major transition in **1b** occurs between 230-240 K, with a possible second transition between 260-270K. The major transition in **1d** occurs between 240-260 K.

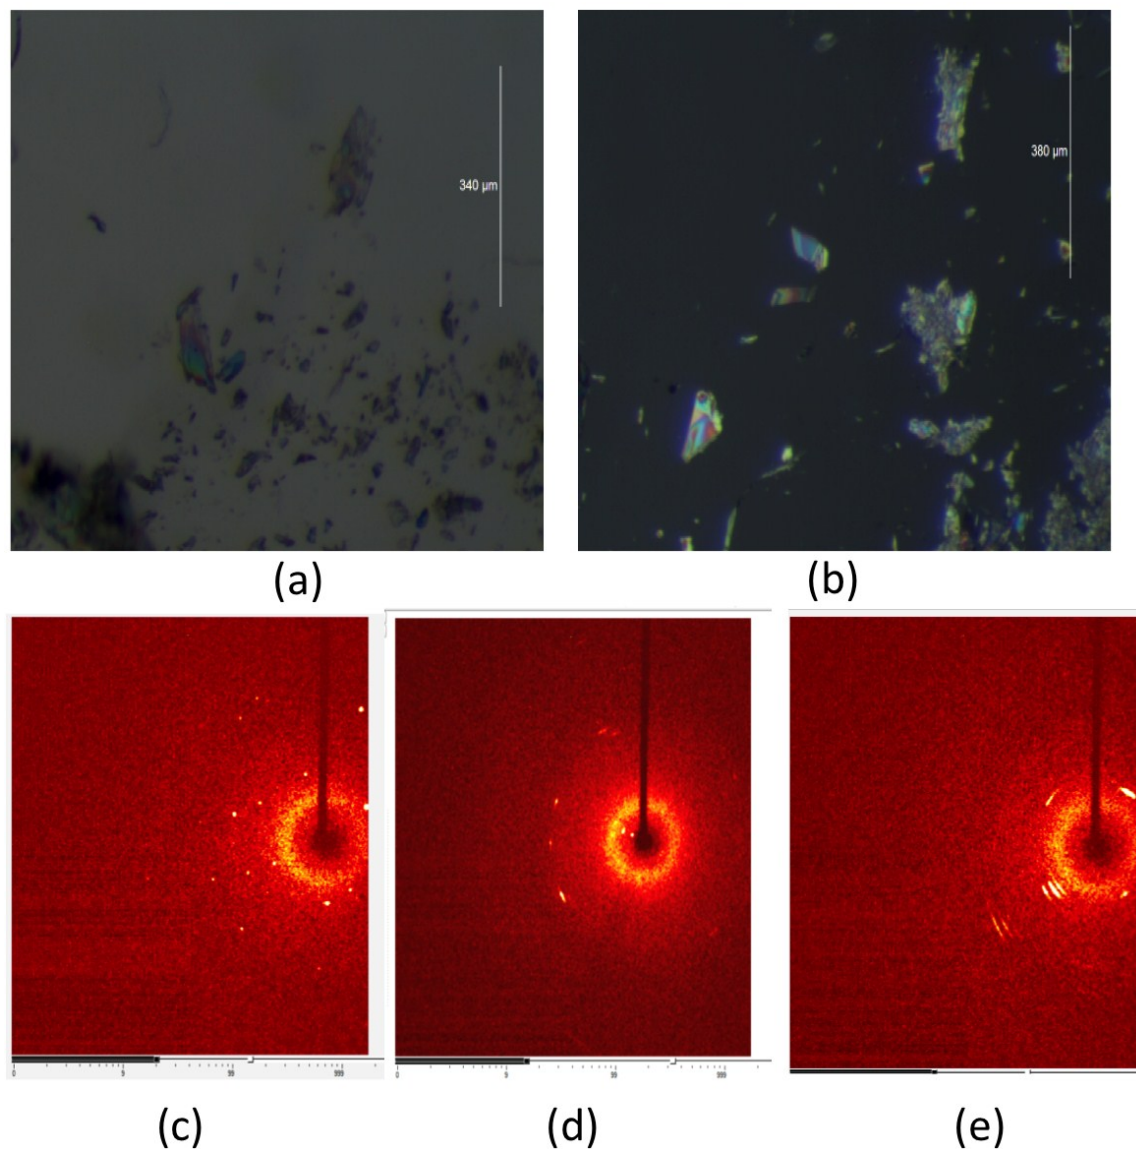

Figure S4: Diffraction behaviour of bis-*N*-pentyl **1d** and bis-*N*-hexyl **1e**. Micrographs of the crystals of (a) bis-*N*-pentyl **1d** and (b) bis-*N*-hexyl **1e** show similar thin plates, however, their diffraction behavior was significantly different. The bis-*N*-pentyl **1d** derivative at 150K showed sharp diffraction spots that extended to a reasonably high resolution (c) and subsequent structure solution revealed no disorder in the alkyl chains. The same crystal at room temperature (298 K) had weak diffraction and streaky spots in most regions (d) that we associated with the disordered alkyl chains. At 150 K the bis-*N*-hexyl **1e** showed very streaky diffraction spots (e) that we associate with highly disordered alkyl chains in its crystal lattice.

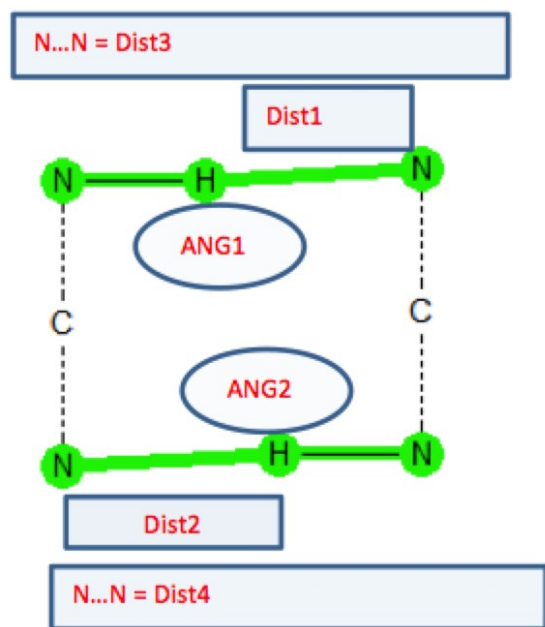

(a)

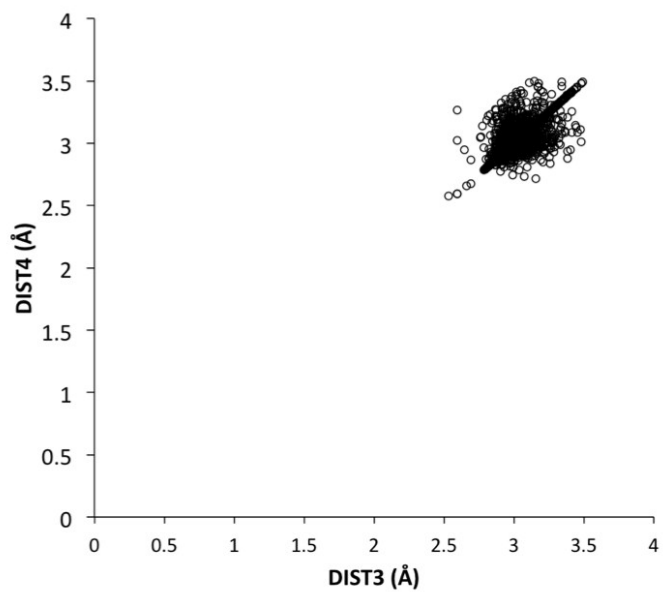

(b)

Figure S5: (a) CCDC Search criteria for the self-complementary NH...N interaction, and (b) spread of both N...N distance values around the mean of 3.03 Å.

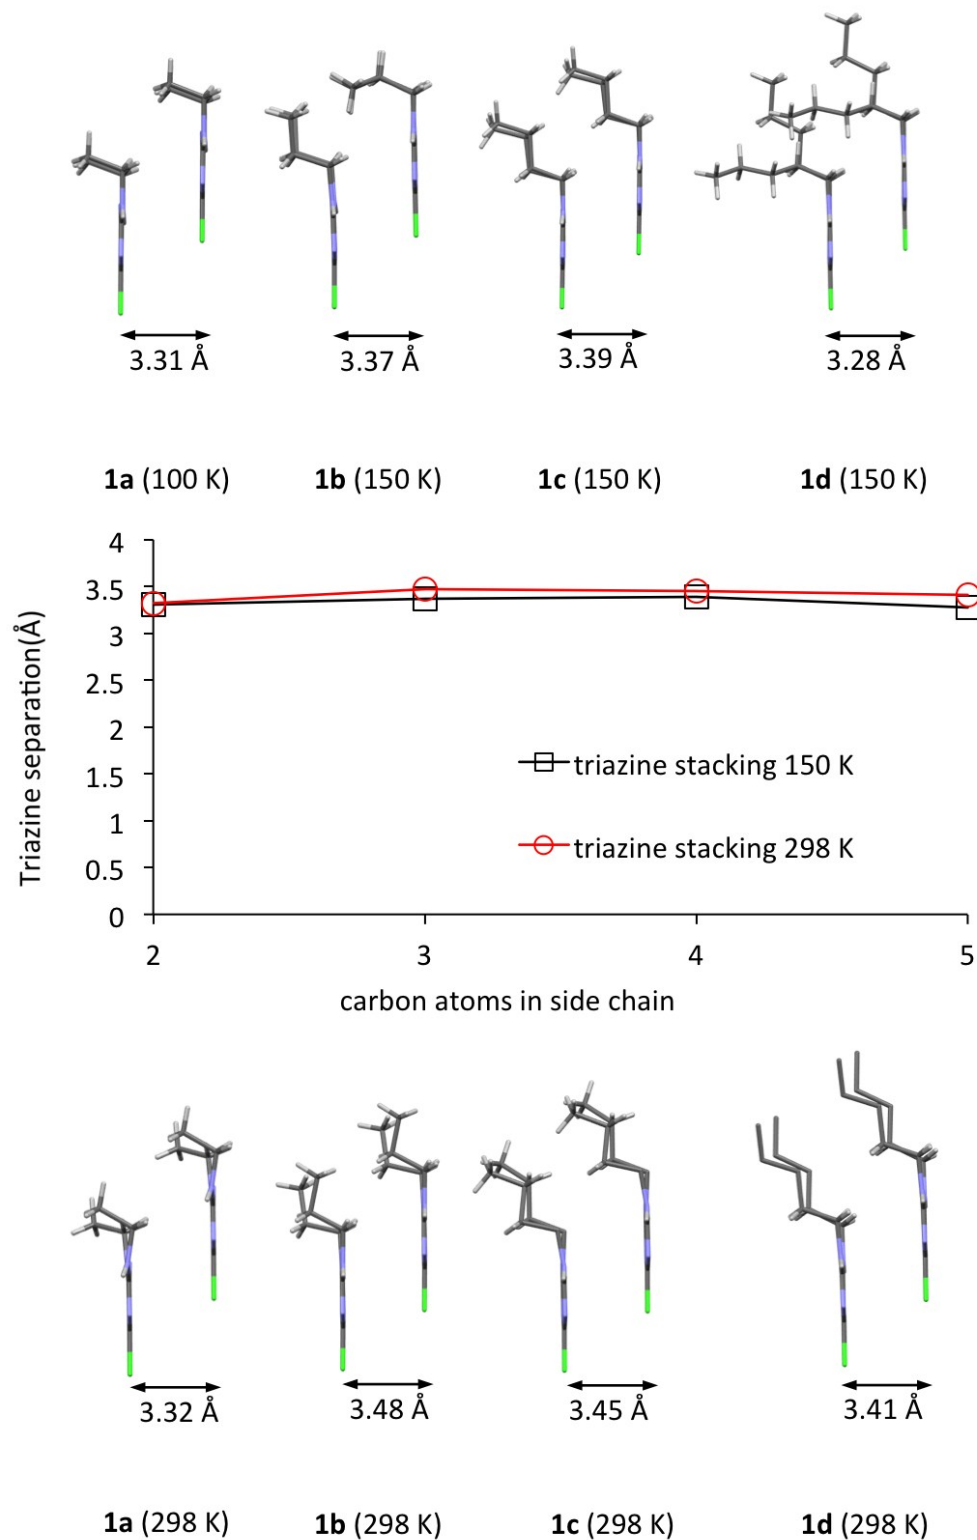

Figure S6: Stacking distance between the triazine rings is relatively unaffected by the alkyl chain length and temperature.
